# Supplementary material for: DFT investigation of the reaction mechanism for the guanidine catalysed ring-opening of cyclic carbonates by aromatic and alkyl-amines
Source: Royal Society of Chemistry journal article supplement (doi:10.1039/c7ra00220c), 2017-01-01
Supplement: c7ra00220c1.pdf [file c7ra00220c1.pdf]

SUPPLEMENTARY INFORMATION for

**DFT investigation of the reaction mechanism for the guanidine catalysed ring-opening of cyclic carbonates by aromatic and alkyl-amines**

M. Alves<sup>a,b</sup>, R. Méreau<sup>a,\*</sup>, B. Grignard<sup>b</sup>, C. Detrembleur<sup>b</sup>, C. Jérôme<sup>b</sup> and T. Tassaing<sup>a</sup>

<sup>a</sup> Institut des Sciences Moléculaires, UMR 5255 CNRS Université Bordeaux, 351 Cours de la Libération, F-33405 Talence Cedex, France.

<sup>b</sup> Center for Education and Research on Macromolecules (CERM), CESAM Research Unit, Université de Liège, Bâtiment B6a, B-4000 LIEGE (Sart Tilman), Belgium

\*Corresponding author: raphael.mereau@u-bordeaux.fr, +33540002281, +33540006994.

# ESI1 - Racemic aminolysis of propylene carbonate by methylamine

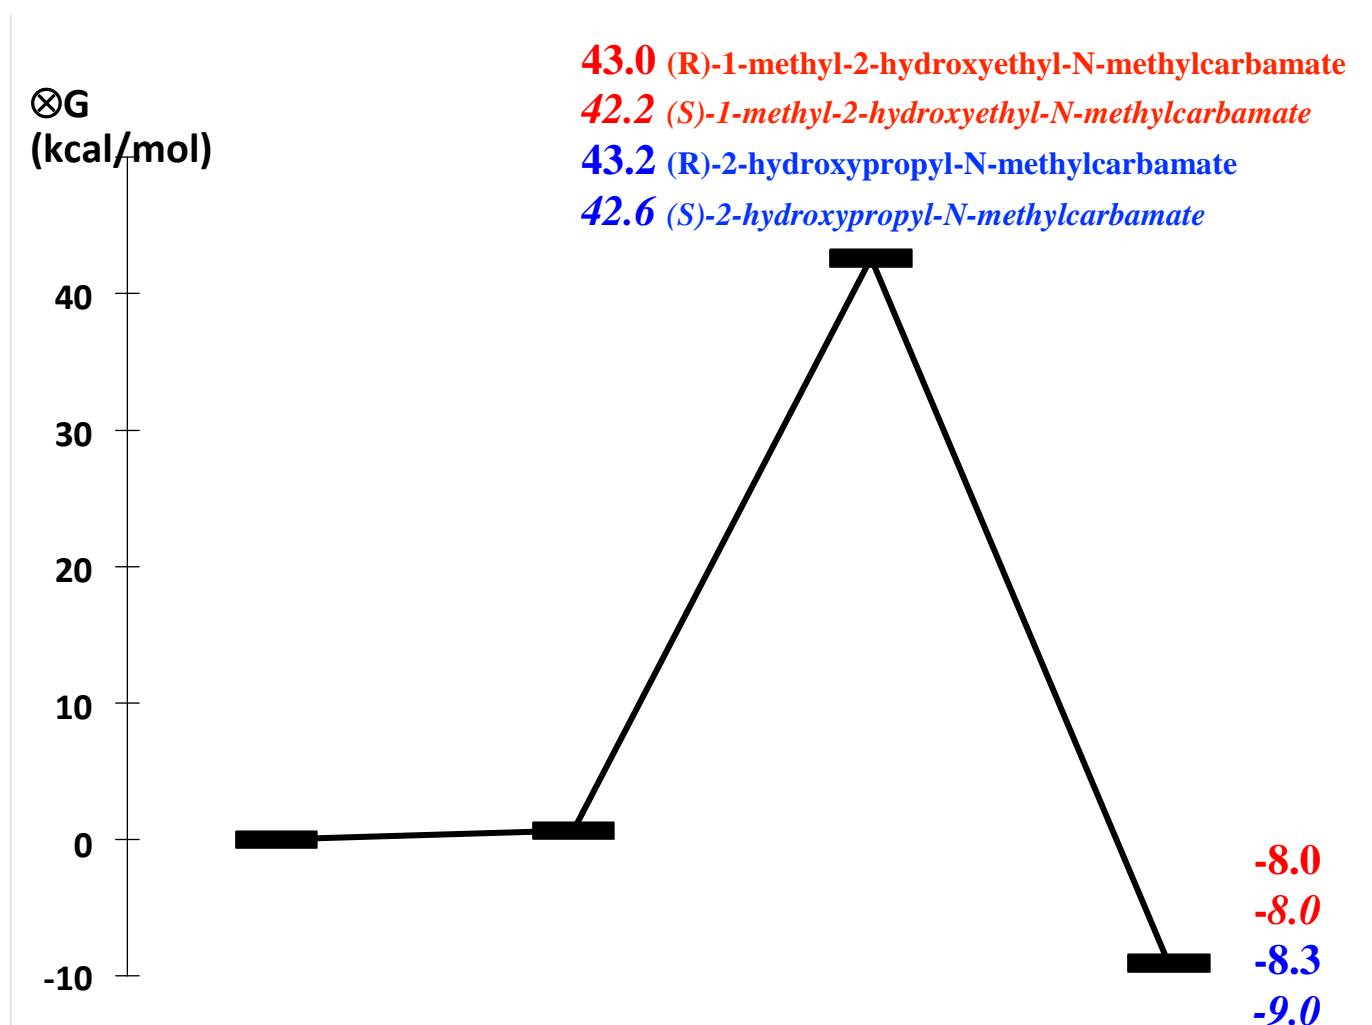

Figure S1: Gibbs free energy profile (M06-2X/6-311G(d,p)) for the racemic aminolysis of propylene carbonate by methylamine.

## ESI2 – Nucleophilic reaction pathway for the TBD catalysed methylamine – propylene carbonate coupling

The nucleophilic activation mechanism by TBD displays a two-step pathway (Figure S2 left), ie the nucleophilic attack of the carbonate by TBD ( $\Delta G= 22.6$  kcal/mol) and the subsequent addition of the amine on the activated carbonate ( $\Delta G= 23.4$  kcal/mol). The molecular structures of the corresponding intermediates and transition states are displayed in Figure S3. At a first glance we observe two transition states higher in energy about 7 – 8 kcal/mol than the ones involved in the proton shuttle mechanism (see Figure S2 right) that is fully discussed in the body of the paper.

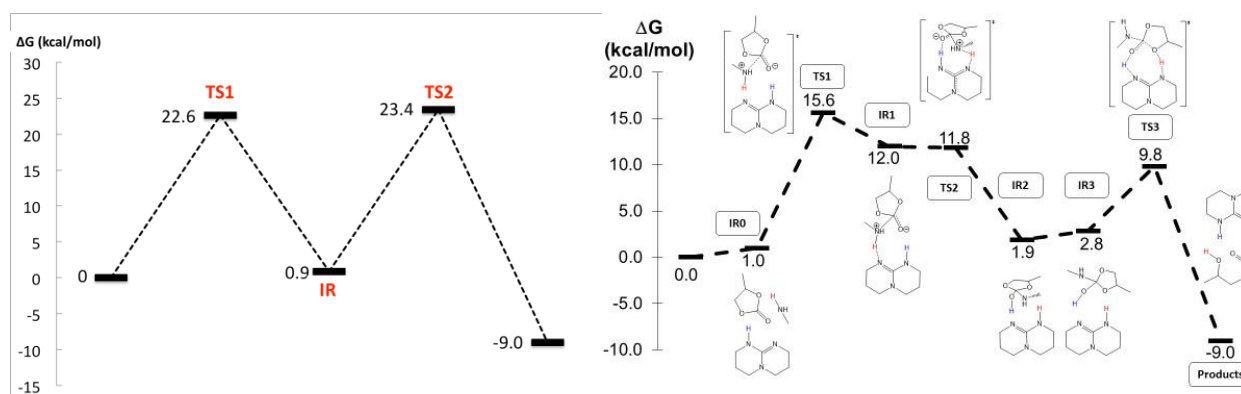

Figure S2: Gibbs free energy profile (M06-2X/6-311G(d,p)) for the reaction of propylene carbonate and methylamine with TBD acting as a nucleophilic catalyst (left) and TBD acting as a base (right). The molecular structures TS1, IR and TS2 of the nucleophilic pathway are depicted below.

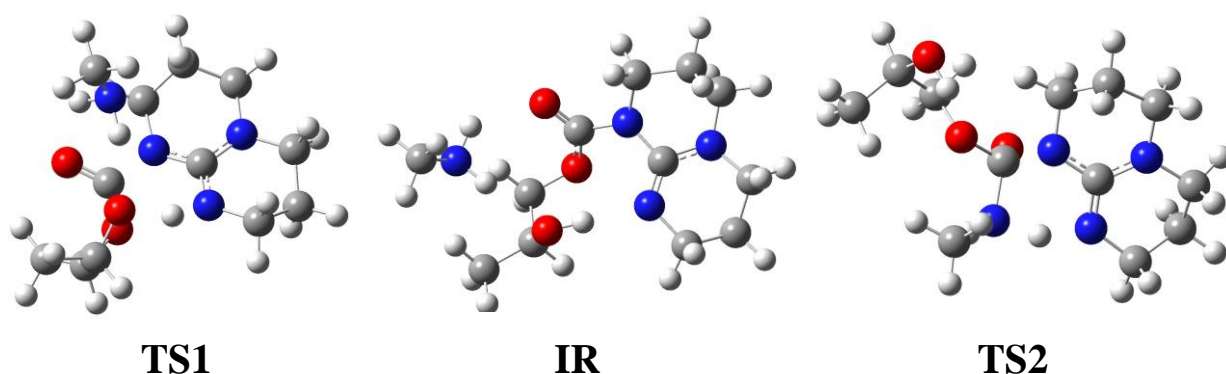

ESI3: Aminolysis of propylene carbonate by cyclohexylamine catalyzed by TBD.

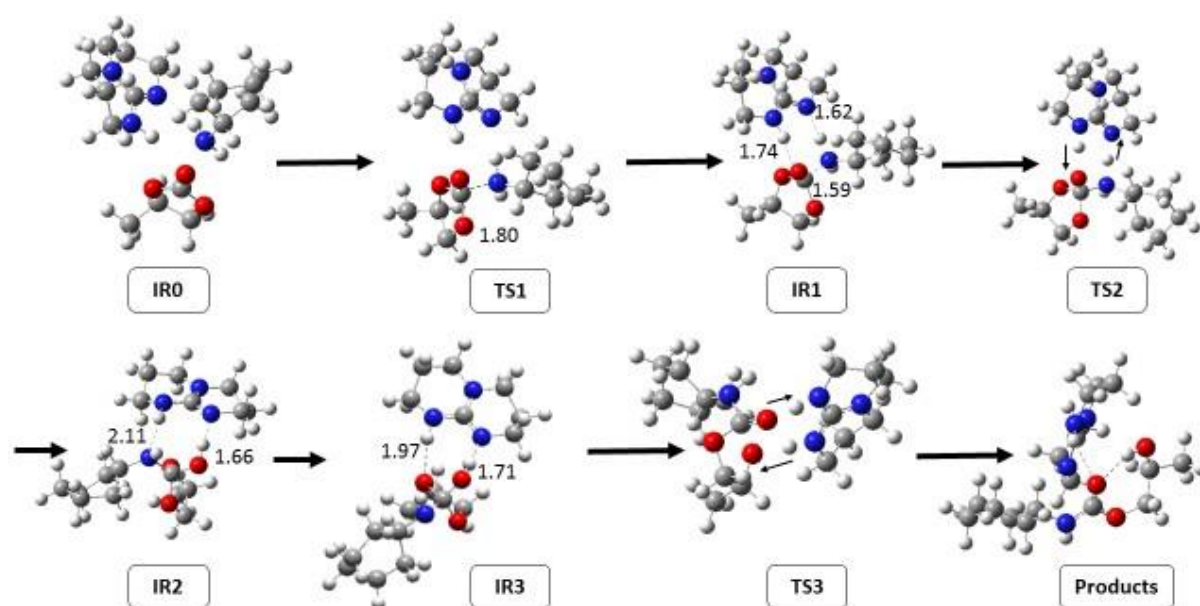

Figure S3: Optimized geometries of the structures (M06-2X/6-311G(d,p)) of the propylene carbonate/cyclohexylamine coupling in the presence of TBD as catalyst. The dashed lines depict hydrogen bond interactions, the arrows represent the concerted proton transfer and intermolecular distances are given in angstrom

ESI4 - Optimized Cartesian coordinates (Å) from M06-2X/6-311G(d) calculations

1- CYCLIC CARBONATE – AMINE COUPLING WITHOUT CATALYST

*TS - Propylene carbonate-methylamine coupling without catalyst*

|   |             |             |             |
|---|-------------|-------------|-------------|
| C | -1.61256000 | -0.41609100 | -0.38389400 |
| H | -1.73362000 | -0.66884900 | -1.45058100 |
| C | -1.41122000 | 1.10687400  | -0.28324800 |
| H | -1.59641100 | 1.45816800  | 0.73739100  |
| O | -0.03166600 | 1.30489800  | -0.60475800 |
| C | 0.74426700  | 0.54952200  | 0.22683600  |
| O | 1.10578600  | 0.82397400  | 1.32922400  |
| N | 1.62807500  | -0.32710200 | -0.67737100 |
| H | 1.79818800  | 0.14737000  | -1.56016300 |
| C | 2.83813400  | -0.82930500 | -0.01343900 |
| H | 2.52493100  | -1.37514100 | 0.87373700  |
| H | 3.37543400  | -1.48949400 | -0.69195100 |
| H | 3.46648800  | 0.00521100  | 0.29349100  |
| C | -2.83657700 | -0.87842700 | 0.39049300  |
| H | -2.69537200 | -0.65493200 | 1.45005800  |
| H | -3.74586400 | -0.38280000 | 0.03751300  |
| H | -2.96317200 | -1.95612200 | 0.28238400  |
| H | -1.99545100 | 1.68741600  | -0.99515700 |
| O | -0.43782400 | -0.95935600 | 0.12917700  |
| H | 0.74568400  | -1.03268500 | -0.68475500 |

*TS - Propylene carbonate-cyclohexylamine coupling without catalyst*

|   |            |             |             |
|---|------------|-------------|-------------|
| C | 3.14297200 | 0.72476300  | -0.12895200 |
| H | 3.23386300 | 1.27651800  | -1.07994700 |
| C | 3.26563000 | -0.77666700 | -0.44793100 |
| H | 3.49301900 | -1.35084700 | 0.45640100  |

|   |             |             |             |
|---|-------------|-------------|-------------|
| O | 1.96897900  | -1.14580500 | -0.92631500 |
| C | 1.02539100  | -0.82160700 | 0.00599300  |
| O | 0.71746500  | -1.45279600 | 0.97106500  |
| N | 0.00486000  | 0.07857500  | -0.70226900 |
| H | -0.02822300 | -0.14365600 | -1.69603500 |
| C | 4.22537100  | 1.19018800  | 0.83253900  |
| H | 4.11519300  | 0.65987500  | 1.78082600  |
| H | 5.22659500  | 1.00538300  | 0.43173100  |
| H | 4.11891400  | 2.25831800  | 1.02462000  |
| H | 3.97889400  | -1.01310800 | -1.23582700 |
| O | 1.87023600  | 0.86655000  | 0.41361100  |
| H | 0.71351500  | 0.92102500  | -0.44246700 |
| C | -1.32770700 | 0.15010200  | -0.07201600 |
| C | -2.06497500 | 1.40683800  | -0.55856100 |
| C | -2.15097500 | -1.10426400 | -0.34033900 |
| H | -1.12349400 | 0.21297400  | 0.99938200  |
| C | -3.58965600 | 1.26115000  | -0.38416400 |
| H | -1.83003700 | 1.57878600  | -1.61451100 |
| H | -1.69442300 | 2.27431900  | -0.00618000 |
| C | -3.41936700 | -1.08301000 | 0.53546200  |
| H | -2.42005700 | -1.12306700 | -1.40407500 |
| H | -1.55484800 | -1.99271100 | -0.12881800 |
| C | -3.91021700 | 0.35347500  | 0.80480200  |
| H | -4.02673900 | 0.82472100  | -1.28795200 |
| H | -4.04459400 | 2.24546700  | -0.26090500 |
| H | -3.21285100 | -1.58463100 | 1.48332600  |
| H | -4.20612900 | -1.65555800 | 0.03850200  |
| H | -3.42279300 | 0.75554500  | 1.69900600  |
| H | -4.98207000 | 0.35123000  | 1.01092900  |

*TS - Propylene carbonate-aniline coupling without catalyst*

|   |            |            |             |
|---|------------|------------|-------------|
| C | 2.89806300 | 0.38220000 | -0.63273500 |
|---|------------|------------|-------------|

|   |             |             |             |
|---|-------------|-------------|-------------|
| H | 3.05421500  | 0.05024300  | -1.67156300 |
| C | 3.08409900  | -0.83839600 | 0.28906600  |
| H | 3.28204300  | -0.52459600 | 1.31935300  |
| O | 1.82779500  | -1.52012000 | 0.23982100  |
| C | 0.83286000  | -0.64845700 | 0.57877000  |
| O | 0.47044500  | -0.33881300 | 1.66574700  |
| N | -0.18497900 | -0.71154500 | -0.62296200 |
| H | -0.14140000 | -1.62874000 | -1.05943800 |
| C | 3.87351000  | 1.49908500  | -0.30096100 |
| H | 3.68672400  | 1.84969400  | 0.71623100  |
| H | 4.91038500  | 1.15883000  | -0.37723300 |
| H | 3.73107100  | 2.33645400  | -0.98452000 |
| H | 3.84549800  | -1.54049000 | -0.04570400 |
| O | 1.57313700  | 0.77129900  | -0.43317000 |
| H | 0.50879300  | 0.06003200  | -1.07737500 |
| C | -1.52128400 | -0.25219100 | -0.36055600 |
| C | -2.60755700 | -1.08791300 | -0.57300200 |
| C | -1.68687800 | 1.04498300  | 0.11211800  |
| C | -3.88981800 | -0.61269500 | -0.32123000 |
| H | -2.45592500 | -2.10013100 | -0.93223300 |
| C | -2.97095200 | 1.50618100  | 0.36432800  |
| H | -0.81210800 | 1.66245400  | 0.28208700  |
| C | -4.07210400 | 0.68271300  | 0.14718000  |
| H | -4.74271000 | -1.25858300 | -0.48904000 |
| H | -3.11122100 | 2.51331800  | 0.73676500  |
| H | -5.07115800 | 1.05033500  | 0.34635300  |

## 2- CYCLIC CARBONATE – ANILINE COUPLING WITH TBD AND MTBD CATALYST

*Propylene carbonate/Aniline coupling catalysed by TBD*

TS1-2

|   |             |             |             |
|---|-------------|-------------|-------------|
| C | 3.13121300  | 2.35768300  | 0.81102000  |
| C | 1.82120300  | 3.11890200  | 1.01193800  |
| H | 3.40699700  | 1.79429700  | 1.71446700  |
| H | 3.96807800  | 2.99147900  | 0.51582400  |
| H | 1.68529700  | 3.44507100  | 2.04565600  |
| O | 0.86604500  | 2.10415900  | 0.74166000  |
| O | 2.82002100  | 1.49034800  | -0.25582100 |
| C | 1.43691400  | 1.18578100  | -0.21237800 |
| O | 0.86232700  | 1.03491700  | -1.30809400 |
| C | 1.66039600  | 4.27837900  | 0.04104000  |
| H | 0.64266400  | 4.66701000  | 0.09479000  |
| H | 2.36034000  | 5.08484600  | 0.27416300  |
| H | 1.84305300  | 3.92586600  | -0.97647800 |
| N | 1.33401600  | -0.18740900 | 0.66963900  |
| H | 1.69572100  | 0.00451600  | 1.60055300  |
| C | 1.99518400  | -1.30856700 | 0.07731500  |
| C | 1.42679800  | -1.89726200 | -1.05039500 |
| C | 3.18354000  | -1.80241300 | 0.60568000  |
| C | 2.05507100  | -2.98766100 | -1.63759700 |
| C | 3.80015200  | -2.89909000 | 0.01599900  |
| C | 3.23706900  | -3.49471800 | -1.10701000 |
| H | 0.51533100  | -1.48029000 | -1.45722400 |
| H | 3.62525700  | -1.32372800 | 1.47358100  |
| H | 1.61737000  | -3.44369000 | -2.51751800 |
| H | 4.72486600  | -3.28268700 | 0.43049400  |
| H | 3.71964700  | -4.34729700 | -1.56923000 |
| H | 0.16880000  | -0.39287300 | 0.70413400  |
| C | -2.13888200 | -0.19543900 | 0.00637400  |



|   |             |             |             |
|---|-------------|-------------|-------------|
| C | -3.99517500 | 0.60393600  | -1.95710300 |
| H | -4.77534300 | 1.17006300  | -2.46909100 |
| H | -3.69938300 | -0.23347200 | -2.59365200 |
| C | -4.53000000 | 0.08749600  | -0.63177700 |
| H | -5.26683400 | -0.70635000 | -0.79548800 |
| H | -5.03985700 | 0.89761500  | -0.09223100 |
| C | -2.77383000 | 1.46520500  | -1.67547600 |
| H | -3.06576900 | 2.34932600  | -1.09199700 |
| H | -2.31189100 | 1.81600800  | -2.59844500 |
| C | -1.56330000 | -1.79331100 | 1.66291500  |
| H | -0.73499400 | -1.92257200 | 2.36478100  |
| H | -1.70865300 | -2.76129900 | 1.16228300  |
| C | -2.84005900 | -1.40022300 | 2.39439100  |
| H | -2.66775800 | -0.45934400 | 2.92326000  |
| H | -3.14322500 | -2.15554800 | 3.12224000  |
| C | -3.93840400 | -1.22049200 | 1.35955200  |
| H | -4.79351800 | -0.68896600 | 1.79218700  |
| H | -4.30168200 | -2.19818000 | 1.01715800  |
| N | -1.19078600 | -0.76680200 | 0.71132600  |
| N | -1.79930500 | 0.66346400  | -0.97170900 |
| N | -3.46910300 | -0.45557700 | 0.20874400  |
| H | -0.78274600 | 0.84983100  | -1.10910200 |

TS3

|   |             |             |             |
|---|-------------|-------------|-------------|
| C | 0.90025900  | -2.39681200 | 1.36748500  |
| H | -0.00075800 | -2.93728900 | 1.06213400  |
| C | 0.57009100  | -0.94460400 | 1.79507800  |
| O | 0.68624800  | -0.20253000 | 0.61632800  |
| C | 1.15753200  | -1.38653300 | -0.64315900 |
| O | 0.10095800  | -1.73681900 | -1.22051700 |
| N | 2.10248200  | -0.70757700 | -1.42954800 |
| H | -0.52836100 | 0.51060500  | 0.37623800  |

|   |             |             |             |
|---|-------------|-------------|-------------|
| H | -0.46429500 | -0.90823200 | 2.17529700  |
| O | 1.76382600  | -2.24417300 | 0.26132000  |
| H | 1.64703600  | -0.34995800 | -2.25583300 |
| C | -2.54057800 | 0.29303500  | -0.12626500 |
| C | -4.10571100 | 2.13005300  | 0.37853400  |
| C | -2.87192100 | 3.01673700  | 0.32027800  |
| C | -1.71373700 | 2.28323000  | 0.97849000  |
| H | -4.50288400 | 2.09156700  | 1.40074000  |
| H | -3.07756100 | 3.96275600  | 0.82326300  |
| H | -0.78421900 | 2.84708100  | 0.89565300  |
| C | -4.96666400 | -0.02509100 | -0.47739900 |
| H | -5.77018800 | 0.17864900  | 0.23689400  |
| H | -5.31046500 | 0.30802800  | -1.46472100 |
| C | -4.63920000 | -1.50973800 | -0.50159300 |
| H | -4.52247100 | -1.88167100 | 0.51924400  |
| H | -5.45642000 | -2.05516200 | -0.97588000 |
| C | -3.33521200 | -1.70925800 | -1.25664800 |
| H | -3.45936100 | -1.41806300 | -2.30764800 |
| H | -3.01463700 | -2.75083600 | -1.23811100 |
| N | -3.80986800 | 0.77285200  | -0.07602500 |
| N | -1.51758700 | 1.01010600  | 0.31578100  |
| N | -2.29930900 | -0.92213800 | -0.61856600 |
| H | -1.29233000 | -1.21020200 | -0.79286600 |
| H | -4.89462700 | 2.52775200  | -0.26694300 |
| H | -2.61634200 | 3.22844400  | -0.72093600 |
| H | -1.92069400 | 2.14044400  | 2.04753700  |
| H | 1.43478200  | -2.95995100 | 2.13211800  |
| C | 1.52371600  | -0.42096200 | 2.86066000  |
| H | 1.32111400  | 0.63355400  | 3.05864900  |
| H | 1.42367100  | -0.98005300 | 3.79564600  |
| H | 2.55196700  | -0.50206000 | 2.50216700  |
| C | 3.18244600  | 0.05623300  | -0.97775700 |

|   |            |             |             |
|---|------------|-------------|-------------|
| C | 3.98870100 | -0.32769900 | 0.09919200  |
| C | 3.50443400 | 1.22876700  | -1.67072800 |
| C | 5.06345700 | 0.46553400  | 0.47901000  |
| H | 3.77246500 | -1.25217900 | 0.61279100  |
| C | 4.59191700 | 2.00379400  | -1.29418600 |
| H | 2.88717300 | 1.53146000  | -2.51060900 |
| C | 5.37725600 | 1.63356600  | -0.20832200 |
| H | 5.67432900 | 0.15376400  | 1.31901700  |
| H | 4.82067500 | 2.90607600  | -1.84984600 |
| H | 6.22339200 | 2.23943900  | 0.09143300  |

*Propylene carbonate/Aniline coupling catalysed by MTBD*

TS1

|   |            |             |             |
|---|------------|-------------|-------------|
| C | 2.34787400 | 1.16947900  | -1.10249100 |
| H | 2.09179300 | 1.76753200  | -1.98016100 |
| C | 3.31583500 | 0.03435900  | -1.45334600 |
| H | 4.35434200 | 0.27111700  | -1.22042600 |
| O | 2.88366200 | -1.01976200 | -0.61701800 |
| C | 1.48445100 | -0.90111200 | -0.48423800 |
| O | 0.73048700 | -1.77397800 | -0.84937800 |
| N | 1.40886600 | -0.93963900 | 1.37444800  |
| H | 1.97757900 | -0.21453100 | 1.80267500  |
| C | 1.80373200 | -2.27527600 | 1.82993800  |
| H | 1.23863100 | -2.99850000 | 1.24223700  |
| H | 2.86482900 | -2.41884400 | 1.62850000  |
| H | 1.59894000 | -2.42412100 | 2.89163100  |
| C | 2.86324400 | 2.06600900  | 0.01122200  |
| H | 3.18649100 | 1.46831900  | 0.86806400  |
| H | 3.72299500 | 2.64212800  | -0.33929700 |
| H | 2.09219100 | 2.76480200  | 0.33840900  |
| H | 3.22931100 | -0.25825600 | -2.50472400 |
| O | 1.17548100 | 0.45811500  | -0.71571600 |

|   |             |             |             |
|---|-------------|-------------|-------------|
| H | 0.41440100  | -0.75148000 | 1.58768600  |
| C | -1.77229800 | -0.00783400 | 0.52298200  |
| C | -1.09421700 | 2.36060500  | 0.32001600  |
| C | -0.42924500 | 2.12655600  | 1.66660300  |
| C | -1.29446000 | 1.16785200  | 2.47519700  |
| H | -1.81643400 | 3.18312900  | 0.38803000  |
| H | -0.27537500 | 3.08123600  | 2.17603900  |
| H | -0.84785700 | 0.97431100  | 3.45355400  |
| C | -1.97408300 | 1.22785400  | -1.62635100 |
| H | -2.42209500 | 2.19607400  | -1.87379800 |
| H | -0.98482700 | 1.17747900  | -2.10554800 |
| C | -2.83975300 | 0.08608800  | -2.11554700 |
| H | -3.86209000 | 0.20492500  | -1.74740500 |
| H | -2.86072300 | 0.07924300  | -3.20703900 |
| C | -2.25045900 | -1.20589800 | -1.58297000 |
| H | -1.25140300 | -1.38724500 | -1.99605700 |
| H | -2.88778800 | -2.05433200 | -1.84305400 |
| N | -1.79827300 | 1.17986100  | -0.18138200 |
| N | -1.44951100 | -0.09467700 | 1.78059500  |
| N | -2.19249700 | -1.13984300 | -0.13083400 |
| H | -0.33974100 | 2.64542600  | -0.42538200 |
| H | 0.54515000  | 1.66055900  | 1.51078100  |
| H | -2.27532500 | 1.63125100  | 2.65929200  |
| C | -2.06972000 | -2.41357800 | 0.55399000  |
| H | -2.25128700 | -2.26745200 | 1.61518700  |
| H | -2.81326800 | -3.09986200 | 0.14284200  |
| H | -1.07097600 | -2.83844800 | 0.40503200  |

TS2

|   |             |             |             |
|---|-------------|-------------|-------------|
| C | -1.77221800 | -1.52379500 | -1.10546000 |
| H | -1.26264200 | -1.83439300 | -2.02471700 |
| C | -3.01833800 | -0.66968100 | -1.41950600 |

|   |             |             |             |
|---|-------------|-------------|-------------|
| H | -3.94412700 | -1.24601700 | -1.39333500 |
| O | -3.01916700 | 0.26138600  | -0.36699400 |
| C | -1.63175800 | 0.68768500  | -0.29477000 |
| O | -1.24807300 | 1.54821500  | -1.10961300 |
| N | -1.44850500 | 1.05869600  | 1.17401200  |
| H | -1.94644900 | 0.34965100  | 1.70894400  |
| C | -2.00915500 | 2.38517900  | 1.46163200  |
| H | -1.53148200 | 3.10192800  | 0.79723300  |
| H | -3.08376700 | 2.39883400  | 1.26971900  |
| H | -1.80979200 | 2.65091400  | 2.50094300  |
| C | -2.11236600 | -2.73509600 | -0.25002200 |
| H | -2.68698000 | -2.41012700 | 0.62205900  |
| H | -2.71078700 | -3.45599700 | -0.81317600 |
| H | -1.20674000 | -3.23785000 | 0.09766800  |
| H | -2.91855300 | -0.15718400 | -2.38169200 |
| O | -0.93929400 | -0.63752800 | -0.37609500 |
| H | -0.15188200 | 0.95641100  | 1.44879900  |
| C | 1.56698000  | 0.34996400  | 0.44826700  |
| C | 1.62825900  | -2.07001600 | 0.91756100  |
| C | 0.72752700  | -1.74207700 | 2.09663200  |
| C | 1.15244600  | -0.39421600 | 2.66343000  |
| H | 2.55382000  | -2.54739400 | 1.25939000  |
| H | 0.79745900  | -2.53809700 | 2.84105200  |
| H | 0.51337500  | -0.09700900 | 3.49773600  |
| C | 2.37435400  | -1.25660300 | -1.24277400 |
| H | 3.16680400  | -2.00913600 | -1.18498300 |
| H | 1.49862100  | -1.72272700 | -1.71393200 |
| C | 2.80930800  | -0.05691900 | -2.05992100 |
| H | 3.78711600  | 0.29899200  | -1.72580900 |
| H | 2.88766800  | -0.34411400 | -3.10996200 |
| C | 1.77860600  | 1.04105100  | -1.87145100 |
| H | 0.78250000  | 0.76117100  | -2.23307000 |

|   |             |             |             |
|---|-------------|-------------|-------------|
| H | 2.08306100  | 1.95577600  | -2.38156000 |
| N | 2.00257100  | -0.89412800 | 0.12238200  |
| N | 1.05370000  | 0.63827600  | 1.64334100  |
| N | 1.68632500  | 1.34627300  | -0.44919400 |
| H | 1.12366100  | -2.77227900 | 0.24492700  |
| H | -0.30472400 | -1.66802200 | 1.75109600  |
| H | 2.17842000  | -0.44756700 | 3.04712100  |
| C | 1.33864200  | 2.72163900  | -0.11433700 |
| H | 1.36419100  | 2.84837100  | 0.96476700  |
| H | 2.07907200  | 3.38149200  | -0.57329100 |
| H | 0.34207600  | 2.94127000  | -0.50378800 |

TS3

|   |             |             |             |
|---|-------------|-------------|-------------|
| C | -2.74540300 | -0.90239800 | 0.39228000  |
| H | -2.55640000 | -1.98060400 | 0.52426000  |
| C | -2.91868600 | -0.59788200 | -1.11561200 |
| H | -3.95715100 | -0.65017300 | -1.44458800 |
| O | -2.49064400 | 0.73687300  | -1.23716200 |
| C | -1.19807600 | 0.86048500  | -0.71173000 |
| O | -0.24416100 | 0.33124100  | -1.28324700 |
| N | -1.03389300 | 2.13645300  | -0.08548500 |
| H | -1.89094700 | 2.34233400  | 0.41567300  |
| C | -0.75585600 | 3.18010300  | -1.07488100 |
| H | 0.10539100  | 2.87275300  | -1.66987300 |
| H | -1.59254000 | 3.35774100  | -1.76151100 |
| H | -0.51184300 | 4.11259700  | -0.56234200 |
| C | -3.98905000 | -0.50158500 | 1.17842900  |
| H | -4.22807600 | 0.54138400  | 0.95349500  |
| H | -4.85102700 | -1.12314100 | 0.91852400  |
| H | -3.79933200 | -0.58919200 | 2.24940600  |
| H | -2.30215100 | -1.25232900 | -1.74093200 |
| O | -1.64555600 | -0.14347200 | 0.79532200  |

|   |             |             |             |
|---|-------------|-------------|-------------|
| H | -0.45108200 | -0.94975400 | 1.16928300  |
| C | 1.41323900  | -0.55583900 | 0.66958500  |
| C | 1.78847200  | -1.91925500 | -1.33813700 |
| C | 0.54357700  | -2.67831000 | -0.90890100 |
| C | 0.54177700  | -2.77577600 | 0.60875100  |
| H | 2.63979600  | -2.59695600 | -1.46148200 |
| H | 0.53059300  | -3.66170800 | -1.38273300 |
| H | -0.33894400 | -3.29718500 | 0.98269100  |
| C | 3.05951500  | 0.12118200  | -1.00590200 |
| H | 3.92845400  | -0.39771900 | -1.42029300 |
| H | 2.49420800  | 0.56929900  | -1.83267700 |
| C | 3.47133200  | 1.20215100  | -0.02748400 |
| H | 4.14719700  | 0.79840600  | 0.73068000  |
| H | 3.99124800  | 1.99857400  | -0.56255000 |
| C | 2.21455300  | 1.73516700  | 0.63688700  |
| H | 1.54314000  | 2.20306000  | -0.08781700 |
| H | 2.45716200  | 2.46697400  | 1.40814900  |
| N | 2.19987300  | -0.87882300 | -0.37751000 |
| N | 0.53490800  | -1.43694400 | 1.17831100  |
| N | 1.52324000  | 0.62865600  | 1.28568400  |
| H | 1.59892900  | -1.41748300 | -2.29126800 |
| H | -0.33597900 | -2.11378800 | -1.21959200 |
| H | 1.42538300  | -3.31861300 | 0.96263600  |
| C | 0.71559500  | 0.92394100  | 2.46774200  |
| H | 0.64857400  | 0.03125800  | 3.08735400  |
| H | 1.21968600  | 1.71494300  | 3.02323300  |
| H | -0.28623100 | 1.24488100  | 2.17981100  |

### 3- CYCLIC CARBONATE – METHYLAMINE COUPLING WITH TBD AND MTBD CATALYST

*Propylene carbonate/Methylamine coupling catalysed by TBD*

TS1

|   |             |             |             |
|---|-------------|-------------|-------------|
| C | 3.79180800  | 0.18367100  | -0.55439600 |
| H | 4.28816000  | 1.08578800  | -0.17742300 |
| C | 2.47869900  | 0.53755900  | -1.25407100 |
| O | 1.53485700  | 0.44436400  | -0.19404100 |
| C | 2.06829600  | -0.30489900 | 0.87096300  |
| O | 1.75314200  | -0.05136600 | 2.01679600  |
| N | 1.29095400  | -1.96853900 | 0.54386400  |
| H | 0.28331400  | -1.84600000 | 0.76984300  |
| C | 1.41463200  | -2.54309300 | -0.79158100 |
| H | 1.02221800  | -3.56204300 | -0.84487100 |
| H | 0.84131800  | -1.91689500 | -1.47679000 |
| H | 2.46477300  | -2.54824300 | -1.09091500 |
| O | 3.38740100  | -0.63307200 | 0.52593000  |
| H | 1.73392100  | -2.54428200 | 1.25402800  |
| C | -1.69400900 | -0.11669300 | 0.56727400  |
| C | -3.64451400 | -0.08288100 | -0.94867400 |
| C | -3.73735700 | -1.54375400 | -0.53591900 |
| C | -2.32225500 | -2.11073400 | -0.46314700 |
| H | -3.48815500 | -0.00086300 | -2.03243600 |
| H | -4.36173900 | -2.09029700 | -1.24589900 |
| H | -2.34735800 | -3.16964600 | -0.19557700 |
| C | -2.54481100 | 2.03304200  | -0.29275800 |
| H | -2.85480500 | 2.33626500  | -1.29811800 |
| H | -3.27558300 | 2.44861500  | 0.41719800  |
| C | -1.14905400 | 2.54588100  | 0.02226100  |
| H | -0.44773900 | 2.15585000  | -0.72030200 |



|   |             |             |             |
|---|-------------|-------------|-------------|
| H | -1.12767100 | 3.63687200  | -0.00550900 |
| C | -0.74620600 | 2.03543200  | 1.39470400  |
| H | -1.30444600 | 2.57484900  | 2.16926800  |
| H | 0.32067500  | 2.18825500  | 1.57241000  |
| N | -2.54814600 | 0.58135900  | -0.25446100 |
| N | -1.52594000 | -1.40398600 | 0.52181500  |
| N | -1.00108800 | 0.60532800  | 1.49807400  |
| H | -0.23042400 | 0.09303700  | 1.91492300  |
| H | -4.57653100 | 0.44539100  | -0.71328500 |
| H | -4.19267500 | -1.62427200 | 0.45473200  |
| H | -1.86673000 | -2.04431600 | -1.46547100 |
| H | 4.48074600  | -0.37340000 | -1.19013800 |
| C | 2.44572300  | 1.92693400  | -1.85267300 |
| H | 3.23122900  | 2.03484700  | -2.60496900 |
| H | 1.48485900  | 2.12035100  | -2.33131800 |
| H | 2.60211600  | 2.66957400  | -1.06773200 |
| H | 2.24114600  | -0.21078300 | -2.01806900 |

TS2

|   |            |             |             |
|---|------------|-------------|-------------|
| C | 4.11371600 | -0.07102500 | 0.72131700  |
| C | 3.06081500 | 0.80195600  | 1.40576100  |
| H | 4.32830500 | -0.96851500 | 1.31677100  |
| H | 5.04716800 | 0.45823600  | 0.51903700  |
| H | 3.09804800 | 0.71569700  | 2.49385600  |
| O | 1.86522800 | 0.17845200  | 0.96755400  |
| O | 3.50124100 | -0.41413800 | -0.50385800 |
| C | 2.07796000 | -0.21330800 | -0.40657800 |
| O | 1.57932900 | 0.51839400  | -1.31144000 |
| C | 3.12188700 | 2.25845700  | 0.96669200  |
| H | 2.24386800 | 2.79144200  | 1.33550000  |
| H | 4.02035600 | 2.74266100  | 1.35792600  |
| H | 3.12339500 | 2.31025900  | -0.12366200 |

|   |             |             |             |
|---|-------------|-------------|-------------|
| N | 1.44251200  | -1.61572200 | -0.41553800 |
| H | 1.84707700  | -2.15754400 | 0.34404500  |
| C | 1.62080800  | -2.27908500 | -1.71300600 |
| H | 0.25186400  | -1.41437200 | -0.24711600 |
| C | -1.65657600 | -0.03535300 | -0.19509300 |
| C | -2.90920400 | 2.37411600  | -0.93581800 |
| H | -3.32951000 | 3.37931200  | -0.86970800 |
| H | -3.03067300 | 2.01315000  | -1.95986900 |
| C | -3.63830100 | 1.45608000  | 0.03125400  |
| H | -4.65406700 | 1.24959900  | -0.32375000 |
| H | -3.72988100 | 1.94113600  | 1.01280600  |
| C | -1.43014100 | 2.36093600  | -0.58145200 |
| H | -1.28271700 | 2.78069100  | 0.42348400  |
| H | -0.84596600 | 2.96202500  | -1.27852800 |
| C | -1.89650500 | -2.35781200 | 0.26832800  |
| H | -1.22003200 | -3.15451700 | 0.59091200  |
| H | -2.47926300 | -2.75530300 | -0.57548700 |
| C | -2.84332900 | -1.96502900 | 1.39530300  |
| H | -2.25276200 | -1.62179900 | 2.24863900  |
| H | -3.46249200 | -2.80471700 | 1.71746000  |
| C | -3.72997700 | -0.84005200 | 0.89049000  |
| H | -4.25027000 | -0.35437200 | 1.72346200  |
| H | -4.49791400 | -1.23640200 | 0.21304800  |
| N | -1.09241600 | -1.22438100 | -0.13878400 |
| N | -0.94893800 | 1.00143800  | -0.66349200 |
| N | -2.95316800 | 0.17820700  | 0.19317900  |
| H | 0.05423300  | 0.82244100  | -0.94405100 |
| H | 2.67904200  | -2.45530000 | -1.90687800 |
| H | 1.06679800  | -3.21866800 | -1.72749900 |
| H | 1.22616400  | -1.60287000 | -2.46919900 |

TS3

|   |             |             |             |
|---|-------------|-------------|-------------|
| C | -3.17986000 | 0.10641500  | -1.59262800 |
| H | -2.55907800 | -0.25242800 | -2.41769700 |
| C | -2.48639200 | 1.25313400  | -0.82000000 |
| O | -1.72368300 | 0.60256000  | 0.15537900  |
| C | -2.08613200 | -1.11083200 | -0.03544700 |
| O | -1.15592500 | -1.58491000 | -0.75941900 |
| N | -2.23796000 | -1.60750900 | 1.25985000  |
| H | -0.23521600 | 0.80641700  | 0.00272200  |
| C | -3.10981300 | -0.89700400 | 2.17974000  |
| H | -3.17093200 | -1.45774400 | 3.11355100  |
| H | -2.76680800 | 0.12369500  | 2.37837600  |
| H | -4.10775800 | -0.84935900 | 1.74545800  |
| H | -1.84038800 | 1.82065200  | -1.50814400 |
| O | -3.32352600 | -0.90959800 | -0.62342700 |
| H | -1.33257600 | -1.84325600 | 1.64064900  |
| C | 1.69134500  | 0.02267400  | -0.03211400 |
| C | 3.55278400  | 1.61915500  | 0.27822200  |
| C | 2.47860100  | 2.55683700  | 0.80478100  |
| C | 1.24134500  | 2.41186000  | -0.06913400 |
| H | 3.96872300  | 2.00542100  | -0.66121200 |
| H | 2.85242200  | 3.58189000  | 0.79691400  |
| H | 0.40955900  | 3.00366400  | 0.31620700  |
| C | 4.02639300  | -0.77646800 | -0.09226800 |
| H | 4.83391700  | -0.38037700 | -0.71632600 |
| H | 4.45425800  | -1.00956500 | 0.89119600  |
| C | 3.42866700  | -2.02566200 | -0.71978100 |
| H | 3.21261000  | -1.84492100 | -1.77570500 |
| H | 4.14350600  | -2.84716800 | -0.64994900 |
| C | 2.13026700  | -2.35563500 | 0.00357300  |
| H | 2.34534300  | -2.62335900 | 1.04626600  |
| H | 1.62059400  | -3.20281800 | -0.45653800 |
| N | 3.02475200  | 0.27622700  | 0.05623300  |

|   |             |             |             |
|---|-------------|-------------|-------------|
| N | 0.81905200  | 1.02714700  | -0.08048600 |
| N | 1.23285300  | -1.22028100 | -0.06424300 |
| H | 0.15951300  | -1.38067400 | -0.34753500 |
| H | 4.37722600  | 1.53691400  | 0.99361800  |
| H | 2.22338800  | 2.29037700  | 1.83348700  |
| H | 1.45842600  | 2.76514800  | -1.08551200 |
| H | -4.17490800 | 0.36910800  | -1.95137800 |
| C | -3.49835700 | 2.18776000  | -0.16801600 |
| H | -2.98950600 | 2.90103100  | 0.48380500  |
| H | -4.07336000 | 2.74227600  | -0.91530800 |
| H | -4.18784600 | 1.59817800  | 0.44175500  |

*Propylene carbonate/Methylamine coupling catalysed by MTBD*

TS1

|   |            |             |             |
|---|------------|-------------|-------------|
| C | 2.34787400 | 1.16947900  | -1.10249100 |
| H | 2.09179300 | 1.76753200  | -1.98016100 |
| C | 3.31583500 | 0.03435900  | -1.45334600 |
| H | 4.35434200 | 0.27111700  | -1.22042600 |
| O | 2.88366200 | -1.01976200 | -0.61701800 |
| C | 1.48445100 | -0.90111200 | -0.48423800 |
| O | 0.73048700 | -1.77397800 | -0.84937800 |
| N | 1.40886600 | -0.93963900 | 1.37444800  |
| H | 1.97757900 | -0.21453100 | 1.80267500  |
| C | 1.80373200 | -2.27527600 | 1.82993800  |
| H | 1.23863100 | -2.99850000 | 1.24223700  |
| H | 2.86482900 | -2.41884400 | 1.62850000  |
| H | 1.59894000 | -2.42412100 | 2.89163100  |
| C | 2.86324400 | 2.06600900  | 0.01122200  |
| H | 3.18649100 | 1.46831900  | 0.86806400  |
| H | 3.72299500 | 2.64212800  | -0.33929700 |
| H | 2.09219100 | 2.76480200  | 0.33840900  |
| H | 3.22931100 | -0.25825600 | -2.50472400 |

|   |             |             |             |
|---|-------------|-------------|-------------|
| O | 1.17548100  | 0.45811500  | -0.71571600 |
| H | 0.41440100  | -0.75148000 | 1.58768600  |
| C | -1.77229800 | -0.00783400 | 0.52298200  |
| C | -1.09421700 | 2.36060500  | 0.32001600  |
| C | -0.42924500 | 2.12655600  | 1.66660300  |
| C | -1.29446000 | 1.16785200  | 2.47519700  |
| H | -1.81643400 | 3.18312900  | 0.38803000  |
| H | -0.27537500 | 3.08123600  | 2.17603900  |
| H | -0.84785700 | 0.97431100  | 3.45355400  |
| C | -1.97408300 | 1.22785400  | -1.62635100 |
| H | -2.42209500 | 2.19607400  | -1.87379800 |
| H | -0.98482700 | 1.17747900  | -2.10554800 |
| C | -2.83975300 | 0.08608800  | -2.11554700 |
| H | -3.86209000 | 0.20492500  | -1.74740500 |
| H | -2.86072300 | 0.07924300  | -3.20703900 |
| C | -2.25045900 | -1.20589800 | -1.58297000 |
| H | -1.25140300 | -1.38724500 | -1.99605700 |
| H | -2.88778800 | -2.05433200 | -1.84305400 |
| N | -1.79827300 | 1.17986100  | -0.18138200 |
| N | -1.44951100 | -0.09467700 | 1.78059500  |
| N | -2.19249700 | -1.13984300 | -0.13083400 |
| H | -0.33974100 | 2.64542600  | -0.42538200 |
| H | 0.54515000  | 1.66055900  | 1.51078100  |
| H | -2.27532500 | 1.63125100  | 2.65929200  |
| C | -2.06972000 | -2.41357800 | 0.55399000  |
| H | -2.25128700 | -2.26745200 | 1.61518700  |
| H | -2.81326800 | -3.09986200 | 0.14284200  |
| H | -1.07097600 | -2.83844800 | 0.40503200  |

TS2

|   |             |             |             |
|---|-------------|-------------|-------------|
| C | -1.77221800 | -1.52379500 | -1.10546000 |
|---|-------------|-------------|-------------|

|   |             |             |             |
|---|-------------|-------------|-------------|
| H | -1.26264200 | -1.83439300 | -2.02471700 |
| C | -3.01833800 | -0.66968100 | -1.41950600 |
| H | -3.94412700 | -1.24601700 | -1.39333500 |
| O | -3.01916700 | 0.26138600  | -0.36699400 |
| C | -1.63175800 | 0.68768500  | -0.29477000 |
| O | -1.24807300 | 1.54821500  | -1.10961300 |
| N | -1.44850500 | 1.05869600  | 1.17401200  |
| H | -1.94644900 | 0.34965100  | 1.70894400  |
| C | -2.00915500 | 2.38517900  | 1.46163200  |
| H | -1.53148200 | 3.10192800  | 0.79723300  |
| H | -3.08376700 | 2.39883400  | 1.26971900  |
| H | -1.80979200 | 2.65091400  | 2.50094300  |
| C | -2.11236600 | -2.73509600 | -0.25002200 |
| H | -2.68698000 | -2.41012700 | 0.62205900  |
| H | -2.71078700 | -3.45599700 | -0.81317600 |
| H | -1.20674000 | -3.23785000 | 0.09766800  |
| H | -2.91855300 | -0.15718400 | -2.38169200 |
| O | -0.93929400 | -0.63752800 | -0.37609500 |
| H | -0.15188200 | 0.95641100  | 1.44879900  |
| C | 1.56698000  | 0.34996400  | 0.44826700  |
| C | 1.62825900  | -2.07001600 | 0.91756100  |
| C | 0.72752700  | -1.74207700 | 2.09663200  |
| C | 1.15244600  | -0.39421600 | 2.66343000  |
| H | 2.55382000  | -2.54739400 | 1.25939000  |
| H | 0.79745900  | -2.53809700 | 2.84105200  |
| H | 0.51337500  | -0.09700900 | 3.49773600  |
| C | 2.37435400  | -1.25660300 | -1.24277400 |
| H | 3.16680400  | -2.00913600 | -1.18498300 |
| H | 1.49862100  | -1.72272700 | -1.71393200 |
| C | 2.80930800  | -0.05691900 | -2.05992100 |
| H | 3.78711600  | 0.29899200  | -1.72580900 |
| H | 2.88766800  | -0.34411400 | -3.10996200 |

|   |             |             |             |
|---|-------------|-------------|-------------|
| C | 1.77860600  | 1.04105100  | -1.87145100 |
| H | 0.78250000  | 0.76117100  | -2.23307000 |
| H | 2.08306100  | 1.95577600  | -2.38156000 |
| N | 2.00257100  | -0.89412800 | 0.12238200  |
| N | 1.05370000  | 0.63827600  | 1.64334100  |
| N | 1.68632500  | 1.34627300  | -0.44919400 |
| H | 1.12366100  | -2.77227900 | 0.24492700  |
| H | -0.30472400 | -1.66802200 | 1.75109600  |
| H | 2.17842000  | -0.44756700 | 3.04712100  |
| C | 1.33864200  | 2.72163900  | -0.11433700 |
| H | 1.36419100  | 2.84837100  | 0.96476700  |
| H | 2.07907200  | 3.38149200  | -0.57329100 |
| H | 0.34207600  | 2.94127000  | -0.50378800 |

### TS3

|   |             |             |             |
|---|-------------|-------------|-------------|
| C | -2.74540300 | -0.90239800 | 0.39228000  |
| H | -2.55640000 | -1.98060400 | 0.52426000  |
| C | -2.91868600 | -0.59788200 | -1.11561200 |
| H | -3.95715100 | -0.65017300 | -1.44458800 |
| O | -2.49064400 | 0.73687300  | -1.23716200 |
| C | -1.19807600 | 0.86048500  | -0.71173000 |
| O | -0.24416100 | 0.33124100  | -1.28324700 |
| N | -1.03389300 | 2.13645300  | -0.08548500 |
| H | -1.89094700 | 2.34233400  | 0.41567300  |
| C | -0.75585600 | 3.18010300  | -1.07488100 |
| H | 0.10539100  | 2.87275300  | -1.66987300 |
| H | -1.59254000 | 3.35774100  | -1.76151100 |
| H | -0.51184300 | 4.11259700  | -0.56234200 |
| C | -3.98905000 | -0.50158500 | 1.17842900  |
| H | -4.22807600 | 0.54138400  | 0.95349500  |
| H | -4.85102700 | -1.12314100 | 0.91852400  |
| H | -3.79933200 | -0.58919200 | 2.24940600  |

|   |             |             |             |
|---|-------------|-------------|-------------|
| H | -2.30215100 | -1.25232900 | -1.74093200 |
| O | -1.64555600 | -0.14347200 | 0.79532200  |
| H | -0.45108200 | -0.94975400 | 1.16928300  |
| C | 1.41323900  | -0.55583900 | 0.66958500  |
| C | 1.78847200  | -1.91925500 | -1.33813700 |
| C | 0.54357700  | -2.67831000 | -0.90890100 |
| C | 0.54177700  | -2.77577600 | 0.60875100  |
| H | 2.63979600  | -2.59695600 | -1.46148200 |
| H | 0.53059300  | -3.66170800 | -1.38273300 |
| H | -0.33894400 | -3.29718500 | 0.98269100  |
| C | 3.05951500  | 0.12118200  | -1.00590200 |
| H | 3.92845400  | -0.39771900 | -1.42029300 |
| H | 2.49420800  | 0.56929900  | -1.83267700 |
| C | 3.47133200  | 1.20215100  | -0.02748400 |
| H | 4.14719700  | 0.79840600  | 0.73068000  |
| H | 3.99124800  | 1.99857400  | -0.56255000 |
| C | 2.21455300  | 1.73516700  | 0.63688700  |
| H | 1.54314000  | 2.20306000  | -0.08781700 |
| H | 2.45716200  | 2.46697400  | 1.40814900  |
| N | 2.19987300  | -0.87882300 | -0.37751000 |
| N | 0.53490800  | -1.43694400 | 1.17831100  |
| N | 1.52324000  | 0.62865600  | 1.28568400  |
| H | 1.59892900  | -1.41748300 | -2.29126800 |
| H | -0.33597900 | -2.11378800 | -1.21959200 |
| H | 1.42538300  | -3.31861300 | 0.96263600  |
| C | 0.71559500  | 0.92394100  | 2.46774200  |
| H | 0.64857400  | 0.03125800  | 3.08735400  |
| H | 1.21968600  | 1.71494300  | 3.02323300  |
| H | -0.28623100 | 1.24488100  | 2.17981100  |



#### 4- CYCLIC CARBONATE – CYCLOHEXYLAMINE COUPLING WITH TBD CATALYST

TS1

|   |             |             |             |
|---|-------------|-------------|-------------|
| C | 2.41621200  | 3.32324800  | 0.16745800  |
| C | 1.06160000  | 3.21350800  | 0.87893500  |
| H | 3.25982100  | 3.35354200  | 0.86008000  |
| H | 2.44470600  | 4.20978600  | -0.47523300 |
| H | 1.17613500  | 2.71452100  | 1.85198600  |
| O | 0.32884100  | 2.37973600  | 0.00223900  |
| O | 2.48707400  | 2.15965900  | -0.63294400 |
| C | 1.22054500  | 1.54941300  | -0.69204100 |
| O | 0.85556800  | 0.99890100  | -1.72104900 |
| C | 0.34049700  | 4.52999000  | 1.06218800  |
| H | -0.63124300 | 4.37204700  | 1.53103300  |
| H | 0.92813600  | 5.20111800  | 1.69329700  |
| H | 0.18704600  | 5.00003200  | 0.08921100  |
| N | 1.44903600  | 0.24912000  | 0.54386200  |
| H | 1.80011700  | 0.64239600  | 1.41415000  |
| H | 0.48460100  | -0.13804100 | 0.70447400  |
| C | -2.12117500 | -0.53527600 | -0.01579900 |
| C | -3.96469100 | -0.35324100 | -2.17658300 |
| H | -4.75692200 | 0.03967500  | -2.81664400 |
| H | -3.60852900 | -1.29478200 | -2.60108400 |
| C | -4.51121400 | -0.58095800 | -0.77651300 |
| H | -5.17998900 | -1.44925200 | -0.76035400 |
| H | -5.10642400 | 0.28957400  | -0.46511600 |
| C | -2.79258000 | 0.60987100  | -2.07891900 |
| H | -3.13517600 | 1.58173300  | -1.69439200 |
| H | -2.33357800 | 0.78172300  | -3.05269300 |
| C | -1.54523700 | -1.50290700 | 2.04395400  |

|   |             |             |             |
|---|-------------|-------------|-------------|
| H | -0.75501300 | -1.35715200 | 2.78622500  |
| H | -1.60848400 | -2.58665600 | 1.86125800  |
| C | -2.88311600 | -1.01053000 | 2.58346700  |
| H | -2.80126700 | 0.05711400  | 2.80464600  |
| H | -3.17319600 | -1.53157700 | 3.49849500  |
| C | -3.93433200 | -1.23510000 | 1.50953800  |
| H | -4.84541200 | -0.66960300 | 1.73742700  |
| H | -4.21381500 | -2.29649000 | 1.46727800  |
| N | -1.17484700 | -0.79465300 | 0.83585200  |
| N | -1.79710100 | 0.00779800  | -1.22173500 |
| N | -3.45436300 | -0.80794900 | 0.20146700  |
| H | -0.82972000 | 0.31558000  | -1.34035400 |
| C | 2.37038300  | -0.78866100 | 0.04019200  |
| C | 3.16574000  | -1.43394800 | 1.18877500  |
| C | 1.62627400  | -1.87074400 | -0.73730700 |
| H | 3.05795700  | -0.27965000 | -0.64398000 |
| C | 3.72895100  | -2.81273600 | 0.78928900  |
| H | 2.50186500  | -1.54678900 | 2.05344800  |
| H | 3.97685900  | -0.76191500 | 1.48879800  |
| C | 2.64768500  | -2.74563500 | -1.48824000 |
| H | 1.04052800  | -2.46752700 | -0.02906500 |
| H | 0.92213400  | -1.41306300 | -1.43170400 |
| C | 3.97811900  | -2.87546800 | -0.71878700 |
| H | 3.01028600  | -3.59434000 | 1.05577800  |
| H | 4.64295200  | -3.02415700 | 1.34820200  |
| H | 2.83664200  | -2.31487000 | -2.47471300 |
| H | 2.21809400  | -3.73743900 | -1.65262300 |
| H | 4.65448500  | -2.06156900 | -0.99976400 |
| H | 4.48350100  | -3.80550200 | -0.98780400 |

## TS2

|   |             |             |             |
|---|-------------|-------------|-------------|
| C | -3.05904900 | 2.48176100  | -0.74310100 |
| C | -1.75369600 | 3.22330800  | -1.02684400 |
| H | -3.46696100 | 2.03977000  | -1.66385200 |
| H | -3.82216500 | 3.10353100  | -0.27142100 |
| H | -1.74135200 | 3.67139100  | -2.02311300 |
| O | -0.82870000 | 2.15010700  | -1.02575800 |
| O | -2.65833300 | 1.47893900  | 0.16498700  |
| C | -1.25015000 | 1.21533900  | 0.00146000  |
| O | -0.60221400 | 1.21911500  | 1.08865500  |
| C | -1.41158700 | 4.24909800  | 0.04446700  |
| H | -0.39310700 | 4.61083400  | -0.10438600 |
| H | -2.09875900 | 5.09828100  | 0.00377100  |
| H | -1.46910000 | 3.77849200  | 1.02782400  |
| N | -1.10262600 | -0.11857000 | -0.76317000 |
| H | -1.38480900 | 0.05166200  | -1.72700000 |
| C | -1.81738600 | -1.30772900 | -0.23735200 |
| C | -1.75572400 | -1.41875400 | 1.28420600  |
| C | -3.27277700 | -1.38034000 | -0.74617500 |
| C | -2.23946100 | -2.81743500 | 1.71082800  |
| C | -4.16113200 | -2.20726600 | 0.19729200  |
| C | -3.36174000 | -3.36180900 | 0.80110500  |
| H | -0.73979100 | -1.23297700 | 1.63301800  |
| H | -3.66769100 | -0.36718100 | -0.82612300 |
| H | -1.39668100 | -3.51490600 | 1.70803800  |
| H | -4.52695400 | -1.56696500 | 1.00598100  |
| H | -2.93228900 | -3.95516700 | -0.01434800 |
| H | 0.10945100  | -0.39041600 | -0.73180300 |
| C | 2.31264000  | -0.22951800 | 0.00453100  |
| C | 4.10454300  | 0.61369200  | 1.99460000  |
| H | 4.88013500  | 1.18067700  | 2.51257000  |

|   |             |             |             |
|---|-------------|-------------|-------------|
| H | 3.75086600  | -0.17751000 | 2.66006600  |
| C | 4.68093500  | 0.00853600  | 0.72540500  |
| H | 5.37870200  | -0.80108600 | 0.96523800  |
| H | 5.24369000  | 0.76985500  | 0.16806100  |
| C | 2.92819200  | 1.49824300  | 1.61049700  |
| H | 3.27890300  | 2.34112300  | 0.99889400  |
| H | 2.43693300  | 1.91275000  | 2.49106900  |
| C | 1.74516100  | -1.88371100 | -1.61808700 |
| H | 0.94774300  | -1.98976500 | -2.35907100 |
| H | 1.82516000  | -2.84712100 | -1.09356100 |
| C | 3.07091800  | -1.56572600 | -2.29644000 |
| H | 2.96482600  | -0.63741900 | -2.86362000 |
| H | 3.37586000  | -2.35828700 | -2.98258200 |
| C | 4.12340400  | -1.39343300 | -1.21445500 |
| H | 5.02753200  | -0.93147000 | -1.62605200 |
| H | 4.41345300  | -2.37055500 | -0.80600000 |
| N | 1.37291900  | -0.82095900 | -0.70753900 |
| N | 1.95702200  | 0.69844200  | 0.90014500  |
| N | 3.63848400  | -0.54241100 | -0.13395100 |
| H | 0.92113000  | 0.93202500  | 0.97500600  |
| H | -3.27732100 | -1.82662000 | -1.74719700 |
| H | -5.03947200 | -2.57261500 | -0.33947700 |
| H | -4.01154800 | -4.03535200 | 1.36418300  |
| H | -2.59635300 | -2.76429900 | 2.74248000  |
| H | -2.37116600 | -0.62831000 | 1.71925500  |
| H | -1.26402900 | -2.16870300 | -0.63895000 |

### TS3

|   |             |            |             |
|---|-------------|------------|-------------|
| C | -1.74599100 | 3.20849300 | 0.21790800  |
| H | -0.96283000 | 3.87650000 | -0.14873000 |
| C | -1.23840100 | 2.32984200 | 1.38939500  |

|   |             |             |             |
|---|-------------|-------------|-------------|
| O | -0.74569900 | 1.17903100  | 0.77076500  |
| C | -1.00600700 | 1.43207800  | -0.96771500 |
| O | 0.07238300  | 1.92991400  | -1.41426800 |
| N | -1.41857500 | 0.19611300  | -1.46480400 |
| H | 0.69229600  | 0.74084300  | 0.91424100  |
| H | -0.44181600 | 2.86393100  | 1.92791500  |
| O | -2.08739800 | 2.27563300  | -0.78623400 |
| H | -0.62974500 | -0.33109700 | -1.81604900 |
| C | 2.43362500  | -0.00415600 | 0.03997600  |
| C | 3.88967100  | -1.37590100 | 1.48943500  |
| C | 2.66222400  | -1.48820500 | 2.37899600  |
| C | 1.97894300  | -0.13026400 | 2.42763700  |
| H | 4.67813300  | -0.80542000 | 1.99689400  |
| H | 2.96126600  | -1.81851100 | 3.37487200  |
| H | 1.04070300  | -0.17378300 | 2.98340500  |
| C | 4.54653200  | -0.92388300 | -0.84881000 |
| H | 5.54255600  | -0.80612300 | -0.41023200 |
| H | 4.47208900  | -1.95134100 | -1.22719900 |
| C | 4.33637700  | 0.07193100  | -1.97813600 |
| H | 4.63362400  | 1.07216500  | -1.65359700 |
| H | 4.95242700  | -0.21004500 | -2.83348800 |
| C | 2.85822100  | 0.08632300  | -2.34000800 |
| H | 2.56595500  | -0.89190800 | -2.74420100 |
| H | 2.63982100  | 0.83580100  | -3.10136900 |
| N | 3.56754900  | -0.73304300 | 0.21857500  |
| N | 1.66078800  | 0.29740500  | 1.08120800  |
| N | 2.07693700  | 0.41682300  | -1.16544000 |
| H | 1.19409300  | 1.09840200  | -1.26501400 |
| H | 4.29513100  | -2.36744800 | 1.26453000  |
| H | 1.96736000  | -2.22302700 | 1.96421400  |
| H | 2.62970800  | 0.59850300  | 2.92759900  |
| H | -2.64414100 | 3.77479900  | 0.46374700  |

|   |             |             |             |
|---|-------------|-------------|-------------|
| C | -2.36125300 | 1.96928100  | 2.35588900  |
| H | -2.00727300 | 1.24156000  | 3.08966900  |
| H | -2.73424000 | 2.84998400  | 2.88679700  |
| H | -3.18824300 | 1.51952800  | 1.79925800  |
| C | -2.40565100 | -0.59798400 | -0.75075800 |
| C | -3.37248400 | -1.26625200 | -1.74441700 |
| C | -1.79290400 | -1.66352900 | 0.16164300  |
| H | -2.95671700 | 0.10732100  | -0.12607000 |
| C | -4.10649600 | -2.47001400 | -1.11987900 |
| H | -2.79868500 | -1.58864400 | -2.61917300 |
| H | -4.08269400 | -0.51477400 | -2.09895800 |
| C | -2.87881700 | -2.26466000 | 1.07504900  |
| H | -1.34960000 | -2.44567900 | -0.46960300 |
| H | -0.99420100 | -1.21148500 | 0.75094900  |
| C | -4.26091900 | -2.27938500 | 0.39042800  |
| H | -3.53737000 | -3.38927600 | -1.29743700 |
| H | -5.07926600 | -2.61132600 | -1.59629800 |
| H | -2.93594300 | -1.68219400 | 1.99910500  |
| H | -2.59851400 | -3.28310100 | 1.35985500  |
| H | -4.77713600 | -1.33100000 | 0.57376900  |
| H | -4.88795500 | -3.06313500 | 0.82191800  |

5- CYCLIC CARBONATE – METHYLAMINE COUPLING WITH TBD  
ACTING AS A NUCLEOPHILE (SEE ESI2)

TS1

|   |             |             |             |
|---|-------------|-------------|-------------|
| C | -2.49826900 | -1.74811600 | -1.15827300 |
| H | -3.27567200 | -1.22423600 | -1.72227600 |
| C | -2.62557400 | -1.44857300 | 0.36967300  |
| H | -2.43007300 | -2.37881100 | 0.92512600  |
| O | -1.63226900 | -0.51005400 | 0.66343200  |
| C | -1.13182500 | 0.03403200  | -1.03875800 |
| O | -1.88419000 | 0.91777200  | -1.39444100 |
| O | -1.22316600 | -1.25568200 | -1.52459000 |
| C | 1.16587000  | -0.34478300 | -0.13097000 |
| C | 3.00512700  | 1.18014300  | -0.76418200 |
| C | 1.89874600  | 2.21213800  | -0.84135300 |
| C | 0.71855100  | 1.59725700  | -1.55954100 |
| H | 3.42645400  | 0.97622300  | -1.75603600 |
| H | 2.24799900  | 3.09508300  | -1.37870600 |
| H | -0.13851800 | 2.26407800  | -1.56266500 |
| C | 3.47106900  | -0.87163600 | 0.53287800  |
| H | 4.36351400  | -0.92950400 | -0.09660800 |
| H | 3.75480000  | -0.36654700 | 1.46529700  |
| C | 2.92709300  | -2.25846100 | 0.82406400  |
| H | 2.81475000  | -2.81604200 | -0.10911200 |
| H | 3.62110300  | -2.79991800 | 1.46836700  |
| C | 1.56769700  | -2.10967400 | 1.48717000  |
| H | 1.68026000  | -1.63304600 | 2.46936600  |
| H | 1.09832400  | -3.08200400 | 1.64217900  |
| N | 2.48997300  | -0.05787400 | -0.18106100 |
| N | 0.29410800  | 0.37971000  | -0.86353300 |
| N | 0.70422700  | -1.32469300 | 0.62962200  |
| H | -0.37334100 | -1.17065100 | 0.80091000  |

|   |             |             |             |
|---|-------------|-------------|-------------|
| H | 3.81878000  | 1.52398100  | -0.11906600 |
| H | 1.56664400  | 2.50584900  | 0.15833100  |
| H | 0.97051200  | 1.35200700  | -2.59816100 |
| H | -2.51654200 | -2.81113600 | -1.39254500 |
| C | -4.00721600 | -0.92133000 | 0.72223000  |
| H | -4.78943900 | -1.63324900 | 0.44105600  |
| H | -4.07858100 | -0.72981900 | 1.79414600  |
| H | -4.16843700 | 0.01652200  | 0.18618500  |
| C | -1.31958100 | 3.35568400  | 2.14080100  |
| H | -0.72762600 | 3.21053700  | 3.04750200  |
| H | -2.37995600 | 3.29639600  | 2.42081700  |
| H | -1.12422300 | 4.37154500  | 1.78945500  |
| N | -0.90006500 | 2.39432100  | 1.12341400  |
| H | -1.12126400 | 1.44622300  | 1.42183600  |
| H | -1.47030100 | 2.49989800  | 0.28787000  |

## TS2

|   |             |             |             |
|---|-------------|-------------|-------------|
| C | -2.85079200 | -0.08464700 | 0.93266500  |
| H | -2.38533300 | -0.80596300 | 1.61013400  |
| C | -4.05573700 | -0.70665500 | 0.24084200  |
| O | -3.62434800 | -1.77754700 | -0.58807600 |
| C | -0.65447300 | 0.72162300  | 0.34301700  |
| O | -0.51465400 | 0.96283300  | 1.55181300  |
| H | -4.70097500 | -1.15670400 | 0.99994700  |
| O | -1.95294400 | 0.26617300  | -0.10888200 |
| C | 1.65438800  | -0.02510000 | -0.25166000 |
| C | 2.31524800  | -2.41211500 | 0.07918500  |
| C | 0.89589500  | -2.72003100 | -0.34967800 |
| C | -0.02295200 | -1.68563200 | 0.26907000  |
| H | 2.47210800  | -2.71338900 | 1.12291500  |



|   |             |             |             |
|---|-------------|-------------|-------------|
| H | 0.62067400  | -3.72541000 | -0.02735600 |
| H | -1.05971600 | -1.88730900 | 0.00643200  |
| C | 4.01444100  | -0.64246300 | 0.05102700  |
| H | 4.45348000  | -1.29461100 | 0.81221600  |
| H | 4.51955400  | -0.86003600 | -0.89942800 |
| C | 4.19394600  | 0.81702000  | 0.42786100  |
| H | 3.84267400  | 0.97766900  | 1.45029000  |
| H | 5.24990600  | 1.08820300  | 0.37525700  |
| C | 3.35421400  | 1.65525300  | -0.52412500 |
| H | 3.75870100  | 1.57183800  | -1.54222000 |
| H | 3.39102700  | 2.71105500  | -0.24888000 |
| N | 2.59988100  | -0.98810300 | -0.05149500 |
| N | 0.32162400  | -0.36046400 | -0.24021400 |
| N | 1.97274200  | 1.22558100  | -0.48760200 |
| H | -2.93330300 | -1.39804700 | -1.14286700 |
| H | 3.04134800  | -2.95713700 | -0.53387200 |
| H | 0.80945900  | -2.67239100 | -1.43829500 |
| H | 0.05877700  | -1.70150600 | 1.36485400  |
| C | -1.02263700 | 3.13937400  | -0.06066800 |
| H | -0.63744600 | 3.28618400  | 0.94606800  |
| H | -0.77475000 | 3.99291900  | -0.69180900 |
| H | -2.10718000 | 3.01810700  | -0.00943900 |
| N | -0.39912400 | 1.92640700  | -0.59615600 |
| H | -0.77951800 | 1.68272400  | -1.50786900 |
| H | 0.83057300  | 1.86678800  | -0.61550100 |
| H | -3.12946200 | 0.79543900  | 1.52041400  |
| C | -4.84702600 | 0.31633800  | -0.56613100 |
| H | -5.66110000 | -0.17787200 | -1.09781100 |
| H | -5.26564100 | 1.08875500  | 0.08381200  |
| H | -4.19125100 | 0.79728800  | -1.29599800 |
